# Supplementary material
Source: PubMed Central journal article supplement (PMC3590252)
Supplement: auto-9-303-s01.pdf [file auto-9-303-s01.pdf]

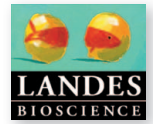

## **Supplemental Material to:**

**Akitoshi Nakashima, Mikiko Yamanaka-Tatematsu,  
Naonobu Fujita, Keiichi Koizumi, Tomoko Shima,  
Toshiko Yoshida, Toshio Nikaido, Aikou Okamoto,  
Tamotsu Yoshimori and Shigeru Saito**

**Impaired autophagy by soluble endoglin,  
under physiological hypoxia in early pregnant period,  
is involved in poor placentation in preeclampsia**

**Autophagy 2012; 9(1)**

**<http://dx.doi.org/10.4161/auto.22927>**

**[www.landesbioscience.com/journals/autophagy/article/22927](http://www.landesbioscience.com/journals/autophagy/article/22927)**

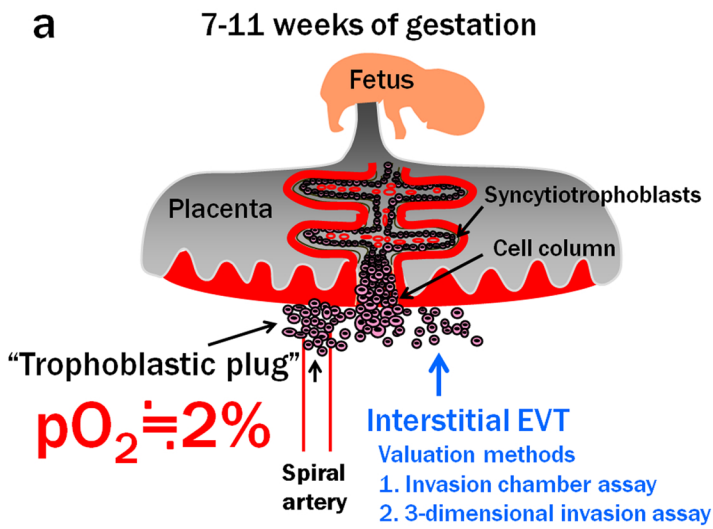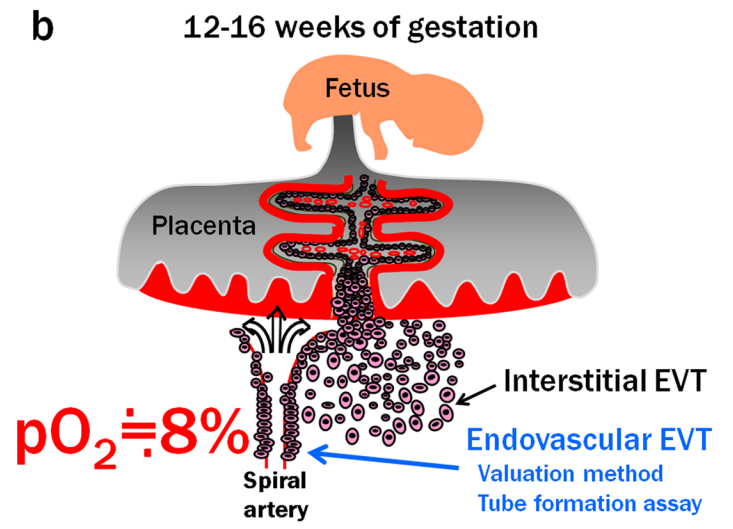

**supplemental figure 1**

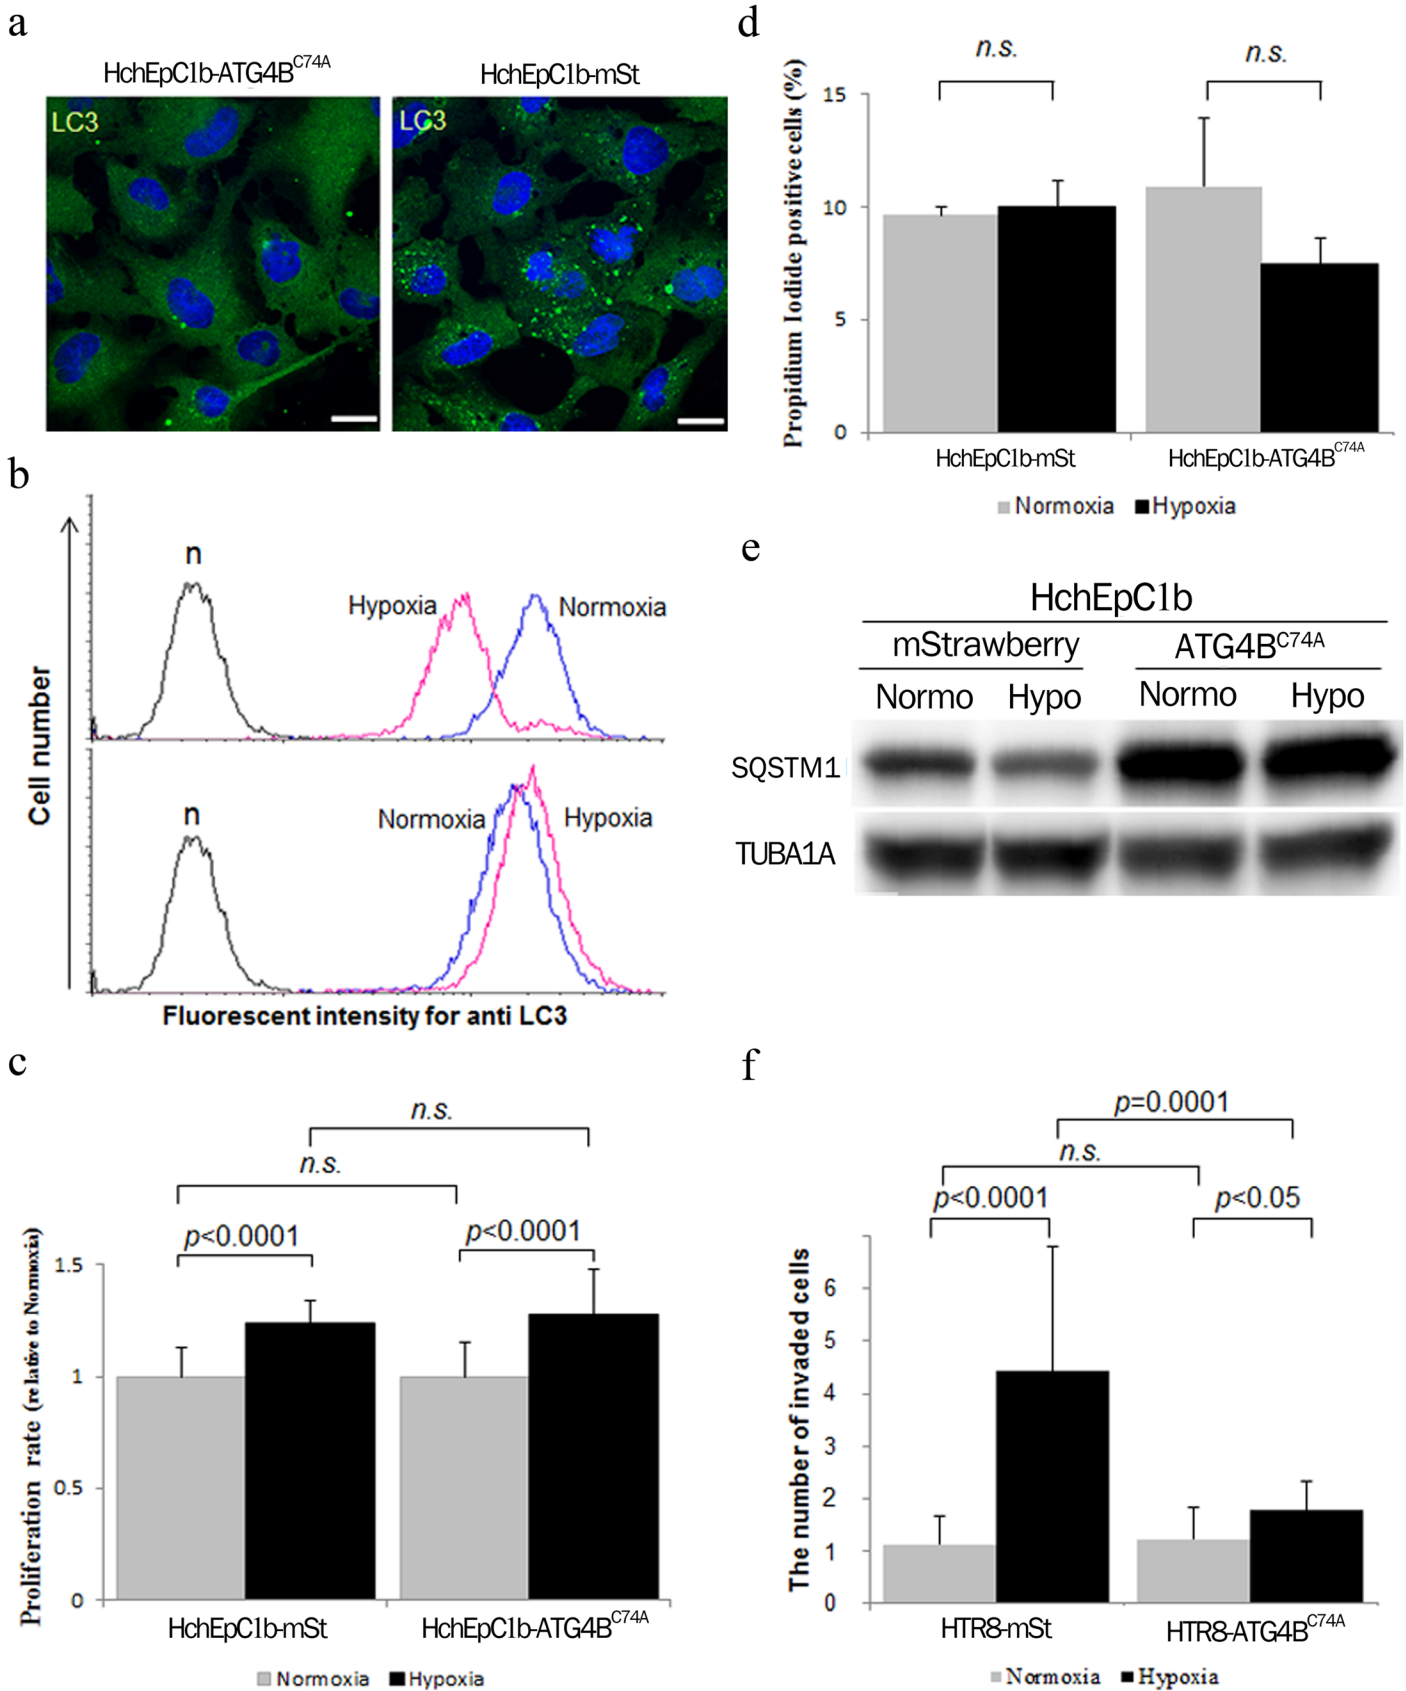

supplemental figure 2

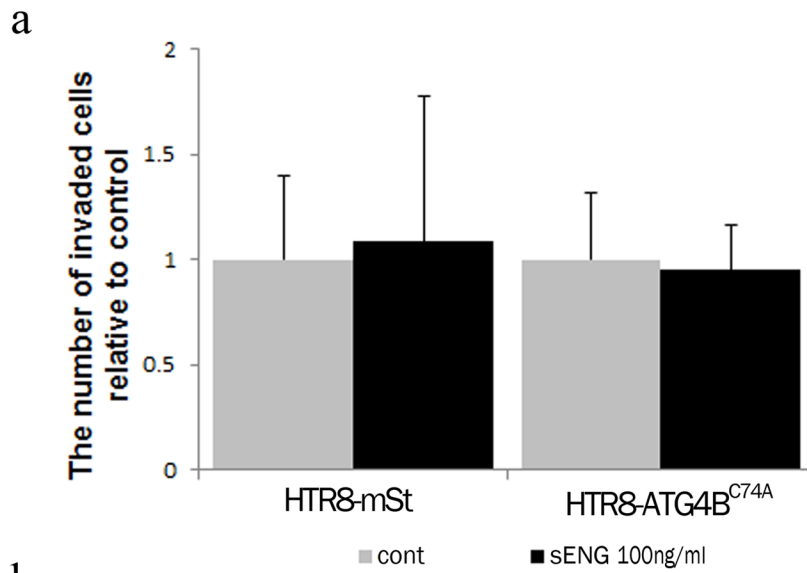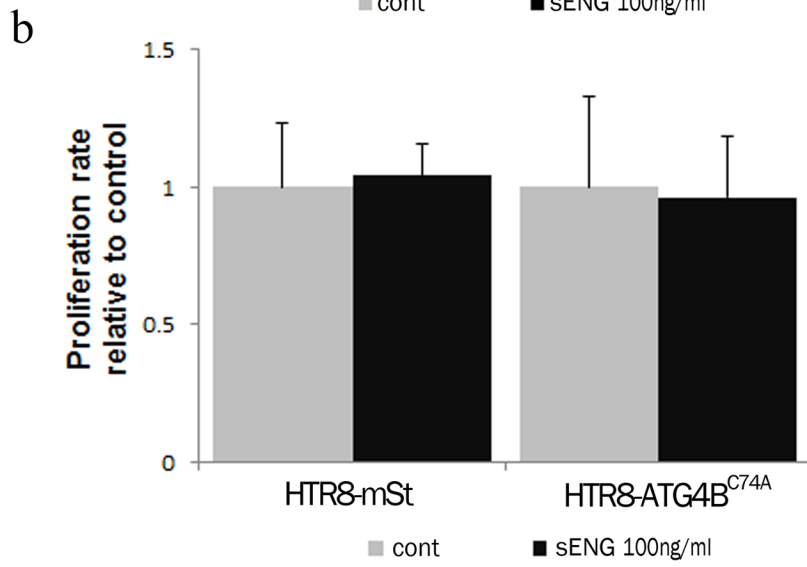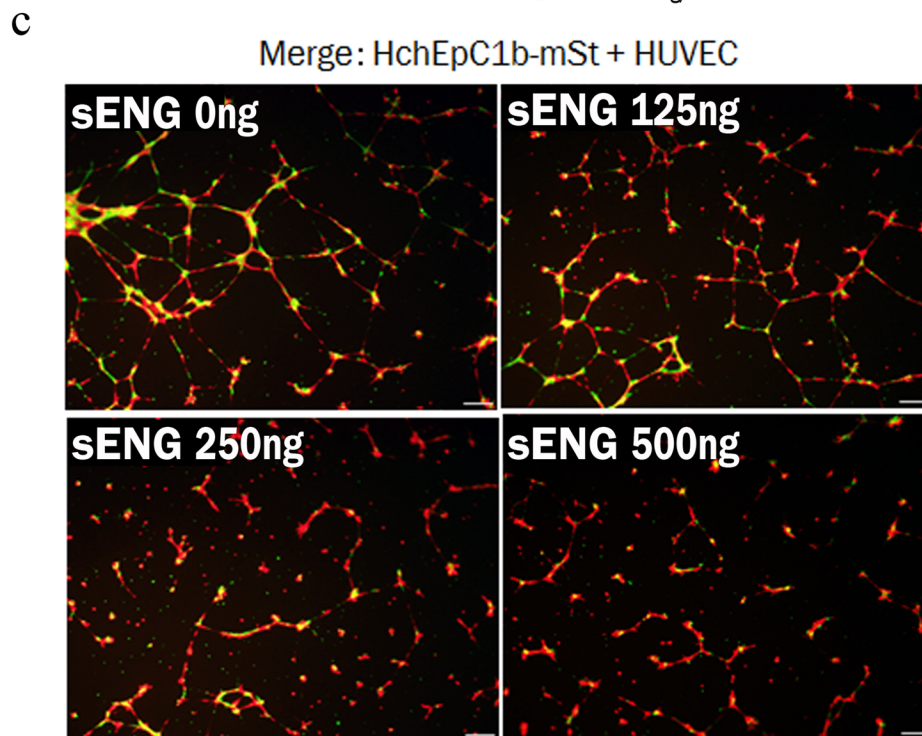

supplemental figure 3

|                                               | <b>PE (n=9)</b>   | <b>NP (n=17)</b>               | <b>Pl. previa (n=3)</b>     |
|-----------------------------------------------|-------------------|--------------------------------|-----------------------------|
| <b>Maternal age (years)</b>                   | <b>35 ± 4.5</b>   | <b>32.6 ± 4.0</b>              | <b>34.3 ± 5.0</b>           |
| <b>Gestational age (weeks)</b>                | <b>33.6 ± 3.0</b> | <b>37.8 ± 1.1<sup>*</sup></b>  | <b>34.3 ± 0.6</b>           |
| <b>Primiparous</b>                            | <b>44%</b>        | <b>43%</b>                     | <b>67%</b>                  |
| <b>Systolic blood pressure (mmHg)</b>         | <b>168 ± 28</b>   | <b>118 ± 11<sup>**</sup></b>   | <b>104 ± 10<sup>*</sup></b> |
| <b>Diastolic blood pressure (mmHg)</b>        | <b>105 ± 15</b>   | <b>73 ± 6<sup>**</sup></b>     | <b>63 ± 4<sup>*</sup></b>   |
| <b>Proteinuria (g protein / g creatinine)</b> | <b>2.4 ± 1.6</b>  | <b>N.D.<sup>@</sup></b>        | <b>N.D.<sup>@</sup></b>     |
| <b>Body weight of neonate (g)</b>             | <b>1823 ± 667</b> | <b>2977 ± 540<sup>**</sup></b> | <b>2140 ± 142</b>           |

Data is presented as Mean ± SEM, \* p<0.05, \*\* p<0.01 vs PE.

N. D.: not detected, @: The quantification of urine protein was not performed in NP group, but all the patients in NP group had urine dipstick negative for proteinuria.

PE: preeclampsia NP: normal pregnancy Pl. previa: placenta previa

supplemental table 1

1 **Supplemental Figure 1. EVT functions during 7 to 11 weeks of gestation (a) and 12 to 16**  
2 **weeks of gestation (b).**

3 (a) No blood flow was observed in the intervillous space before 12 weeks of gestation  
4 (2% O<sub>2</sub>). Interstitial EVTs can invade the maternal decidua under harsh conditions before 12  
5 weeks of gestation. In this study, the invasion chamber assay and three-dimensional invasion  
6 assay were used as a model of interstitial EVT invasion. (b) Subsequently, loss of the  
7 trophoblast plug in the spiral arteries after 12 weeks of gestation allowed maternal blood to  
8 perfuse the intervillous space, resulting in a marked increase in the pO<sub>2</sub> level in the placenta  
9 (8% O<sub>2</sub>). After 12 weeks of gestation, endovascular EVTs started to invade the uterine spiral  
10 arteries, and replace endothelial cells. The tube formation assay was used as a model of vascular  
11 remodeling by endovascular EVTs.

12 **Supplemental Figure 2. Autophagy induction (a and b), cell proliferation (c) and cell death**  
13 **(d), intracytoplasmic SQSTM1 expression (e) and cell invasion (f) in autophagy-deficient**  
14 **EVT cells.**

15 (a) Representative panels show the images with anti-MAP1LC3B (LC3) (green) and  
16 nuclear staining (Hoechst33342, blue) merged in HchEpC1b-ATG4B<sup>C74A</sup>, an autophagy-  
17 deficient EVT cell line, and HchEpC1b-mStrawberry cells under 2% oxygen tension for 24 h.

1 Scale bar: 20  $\mu$ m. (b) Amount of MAP1LC3B in HchEpC1b-mStrawberry cells (upper Figure in  
2 b) and -ATG4B<sup>C74A</sup> cells (lower figure in b). The amount of MAP1LC3B was estimated at 24 h  
3 under 20% oxygen tension (normoxia) and 2% oxygen tension (hypoxia). n: normal rabbit  
4 serum used as a negative control. (c) Cell proliferation rates were estimated by WST-1 assay in  
5 HchEpC1b-ATG4B<sup>C74A</sup> and -mStrawberry cells for 48 h. (d) Analysis of dead cell percentages  
6 in HchEpC1b-ATG4B<sup>C74A</sup> and -mStrawberry cells under normoxia or hypoxia (2% oxygen  
7 tension) for 48 h analyzed by propidium iodide staining. (e) Western blot analysis revealed that  
8 SQSTM1 expression under hypoxia (2% oxygen tension) for 24 h decreased in HchEpC1b-  
9 mStrawberry cells, but was not changed in HchEpC1b-ATG4B<sup>C74A</sup> cells. (f) Invasion assays  
10 were performed under normoxia (gray bars) or hypoxia (black bars) for 48 h. In HTR8-  
11 mStrawberry cells, EVT invasion was increased under hypoxic conditions, but this increase was  
12 not observed in HTR8-ATG4B<sup>C74A</sup> cells. Data were normalized to 1 for normoxia at 24 h.

13 **Supplemental Figure 3. sENG inhibited tube formation, but not EVT invasion under**  
14 **normoxia.**

15 (a) Invasion assays were performed with HTR8-ATG4B<sup>C74A</sup>, an autophagy-deficient  
16 EVT cell line, and -mStrawberry cells in the presence (black bars) or absence (gray bars) of 100  
17 ng/ml sENG under normoxia for 48 h. The Y-axis indicates the number of invading cells. Data  
18 were normalized to 1 for the control at 48 h. (b) Cell proliferation rates were estimated by WST-

1 1 assay in HTR8-ATG4B<sup>C74A</sup> and -mStrawberry cells in the presence (black bars) or absence  
2 (gray bars) of 100 ng/ml sENG under hypoxia for 48 h. Data were normalized to 1 for the  
3 control at 48 h. (c) Tube formation assays by HUVECs (labeled with green) with HchEpC1b-  
4 mStrawberry cells (labeled with red) were performed under 8% oxygen tension for 24 h in the  
5 presence of 0, 125, 250 or 500 ng/ml sENG. Representative figures show the images with  
6 HchEpC1b and HUVECs merged. Scale bar: 300  $\mu$ m.
